# Supplementary material for: Novel Agents as Main Drivers for Continued Improvement in Survival in Multiple Myeloma
Source: Cancers (Basel). 2023 Mar 2;15(5):1558. doi: 10.3390/cancers15051558 (PMC10000382; doi:10.3390/cancers15051558)
Supplement: Supplementary file 1 [file cancers-15-01558-s001.zip › cancers-2237655-supplementary.pdf]

**Supplementary Table S1.** Response after induction according to the treatment divided by age at diagnosis.

|                                            | Age ≤70 years           |                         | Age >70 years           |                         |
|--------------------------------------------|-------------------------|-------------------------|-------------------------|-------------------------|
|                                            | ≥PR after induction (%) | ≥CR after induction (%) | ≥PR after induction (%) | ≥CR after induction (%) |
| <b>Conventional therapies</b>              | 80.3                    | 20.1                    | 68.0                    | 16.8                    |
| <b>Novel agents</b>                        | 92.8                    | 39.6                    | 87.1                    | 34.7                    |
| <b>OR [95% CI], <i>P</i> value</b>         | 3.1 [1.9-5.2], <0.001   | 2.6 [1.8-3.7], <0.001   | 3.2 [1.7-6.1], <0.001   | 2.6 [1.4-4.8], 0.002    |
| <b>Single novel agent inductions</b>       | 85.7                    | 28.6                    | 80.7                    | 26.5                    |
| <b>At least two novel agent inductions</b> | 96.9                    | 46.0                    | 100.0                   | 51.2                    |
| <b>OR [95% CI], <i>P</i> value</b>         | 5.2 [2.1-12.8], <0.001  | 2.1 [1.3-3.4], 0.001    | Not estimated, 0.001    | 2.9 [1.3-6.4], 0.007    |

Abbreviations: CI: confidence interval; CR: complete response; OR: odds ratio; PR: partial response.
